# Supplementary material for: Standardised pre-competitive screening of athletes in some European and African countries: the SMILE study
Source: Springer Nature journal article supplement (doi:10.1007/s11739-013-0955-5), 2013-05-25
Supplement: 11739_2013_955_MOESM1_ESM.pdf [file 11739_2013_955_MOESM1_ESM.pdf]

ID 6\_146\_1\_6

Date 18/03/2008

**SMILE Test****Personal History (Bethesda questionnaire)**

|                                                                                                        | Freq                     | Seldom                   | No                                  | I don't know             |
|--------------------------------------------------------------------------------------------------------|--------------------------|--------------------------|-------------------------------------|--------------------------|
| 1. Have you ever felt dizzy, lightheaded or have you ever fainted during or after exercise?            | <input type="checkbox"/> | <input type="checkbox"/> | <input checked="" type="checkbox"/> | <input type="checkbox"/> |
| 2. Have you ever felt an irregular or fast heart beat during or after exercise?                        | <input type="checkbox"/> | <input type="checkbox"/> | <input checked="" type="checkbox"/> | <input type="checkbox"/> |
| 3. Have you ever felt short of breath during or after exercise?                                        | <input type="checkbox"/> | <input type="checkbox"/> | <input checked="" type="checkbox"/> | <input type="checkbox"/> |
| 4. Have you ever had chest pain during or after exercise?                                              | <input type="checkbox"/> | <input type="checkbox"/> | <input checked="" type="checkbox"/> | <input type="checkbox"/> |
| 5. Do you tire faster than your friends during exercise?                                               | <input type="checkbox"/> | <input type="checkbox"/> | <input checked="" type="checkbox"/> | <input type="checkbox"/> |
| 6. Have you ever been told that you have a heart murmur?                                               | <input type="checkbox"/> |                          | <input checked="" type="checkbox"/> | <input type="checkbox"/> |
| 7. Have you ever been told that you have high blood pressure?                                          | <input type="checkbox"/> | <input type="checkbox"/> | <input checked="" type="checkbox"/> | <input type="checkbox"/> |
| 8. Have you had a serious viral or bacterial infection within the last month?                          | <input type="checkbox"/> |                          | <input checked="" type="checkbox"/> | <input type="checkbox"/> |
| 9. Are you taking any medication, dietary supplements, caffeine or nicotine now or in the recent past? | <input type="checkbox"/> | <input type="checkbox"/> | <input checked="" type="checkbox"/> | <input type="checkbox"/> |

**Family History (Bethesda questionnaire)**

|                                                                                       | Yes                                                | No                                                                       | I don't know                              |                                          |
|---------------------------------------------------------------------------------------|----------------------------------------------------|--------------------------------------------------------------------------|-------------------------------------------|------------------------------------------|
| 1. Has any family member or relative died of heart problems or sudden death?          | <input type="checkbox"/>                           | <input checked="" type="checkbox"/>                                      | <input type="checkbox"/>                  |                                          |
| 2. Has any family member or relative had a significant disability from heart disease? | <input type="checkbox"/>                           | <input checked="" type="checkbox"/>                                      | <input type="checkbox"/>                  |                                          |
| 3. Has any family member or relative been told they have a serious heart dysrhythmia? | <input type="checkbox"/>                           | <input checked="" type="checkbox"/>                                      | <input type="checkbox"/>                  |                                          |
| 4. Has any of your relative ever have any of the following conditions?                |                                                    | <input checked="" type="checkbox"/>                                      | <input type="checkbox"/>                  |                                          |
| <input type="checkbox"/> Hypertrophic cardiomyopathy                                  | <input type="checkbox"/> Coronary artery anomalies | <input type="checkbox"/> Arrhythmogenic right ventricular cardiomyopathy | <input type="checkbox"/> Long QT syndrome | <input type="checkbox"/> Marfan syndrome |

**SMILE Test**

ID 6\_146\_1\_6

Date 18/03/2008

**Physical Examination**

|                  |                                         |                 |                                   |
|------------------|-----------------------------------------|-----------------|-----------------------------------|
| Birthdate        | <input type="text" value="19/12/1987"/> | Sex             | <input type="text" value="Male"/> |
| Height (cm)      | <input type="text" value="180"/>        | Weight (Kg)     | <input type="text" value="74"/>   |
| Resting HR (bpm) | <input type="text"/>                    | Stress HR (bpm) | <input type="text"/>              |

**Rhythm**Blood Pressure (mmHg)  / 

|                         |      |         |        |                   |
|-------------------------|------|---------|--------|-------------------|
| Precordial auscultation | None | Murmurs | Clicks | Other heart sound |
|-------------------------|------|---------|--------|-------------------|

|         |                                     |                          |                          |                          |
|---------|-------------------------------------|--------------------------|--------------------------|--------------------------|
| Sitting | <input checked="" type="checkbox"/> | <input type="checkbox"/> | <input type="checkbox"/> | <input type="checkbox"/> |
|---------|-------------------------------------|--------------------------|--------------------------|--------------------------|

|        |                                     |                          |                          |                          |
|--------|-------------------------------------|--------------------------|--------------------------|--------------------------|
| Supine | <input checked="" type="checkbox"/> | <input type="checkbox"/> | <input type="checkbox"/> | <input type="checkbox"/> |
|--------|-------------------------------------|--------------------------|--------------------------|--------------------------|

**Physical stigmata of Marfan Syndrome**Notes  
**Sports Activity**Sport Training hours/week Competition Notes  
**Select ECG**

Select ECG for this SMILE test

Select an optional ECG without arrhythmias for this SMILE test

**SMILE Test Results**

**Title:**

Standardised pre-competitive screening of athletes in some European and African countries: The SMILE study.

**Journal:**

Internal and Emergency Medicine.

**Author and Affiliations:**

Assanelli Deodato Chair of Sports-Internal Medicine, University of Brescia (Italy)

Ermolao Andrea Sports Medicine Division, Department of Medicine, University of Padova, Italy

Carré François Unité Biologie et Médecine du Sport, Hôpital Pontchavillon, Rennes, France

Deligiannis Asterios Chair of Sport Medicine University of Thessaloniki, Greece

Mellwig Klaus Heart Center NRW, University Hospital, Bad Oeynhausen, Germany

Tahmi Mohamed Service de cardiologie, CHU de Tizi-Ouzou, Algery

Cesana Bruno Mario Chair of statistics, University of Brescia (Italy)

Levaggi Rosella Chair of Health Economics University of Brescia, Italy

Aliverti Paola ET Medical Devices, Milan (Italy)

Sharma Sanjay Department of Heart Muscle Disorders and Sports Cardiology, St Georges Hospital, London, UK

**Corresponding author:** Assanelli Deodato

**E-mail:** [dassanelli@gmail.com](mailto:dassanelli@gmail.com)
