# Supplementary material for: Standardised pre-competitive screening of athletes in some European and African countries: the SMILE study
Source: Springer Nature journal article supplement (doi:10.1007/s11739-013-0955-5), 2013-05-25
Supplement: 11739_2013_955_MOESM2_ESM.pdf [file 11739_2013_955_MOESM2_ESM.pdf]

ID:  
Patient:  
Date naissance: 19/12/1987 (20 Ans)  
Sexe: Mâle  
Poids:  
Taille:

Enregistré le: 18/03/2008 12:37:00  
HR: 76 bpm  
P: 120 ms P Axis: 56°  
PR: 166 ms QRS Axis: 62°  
QRS: 106 ms T Axis: -25°  
QT: 374 ms QTc: 421 ms

Rapport:  
Rythme Sinusal P:QRS - 1:1,Axe P Normal,FC 76 -RSR(V1) -non  
diagnostic Voltage criteria for hypertrophie ventriculaire gauche  
(R(aVF) dépasse 2.00 mV) -lésion antérolatérale - Onde T  
négative -Ischémie Antérieur ANORMALE

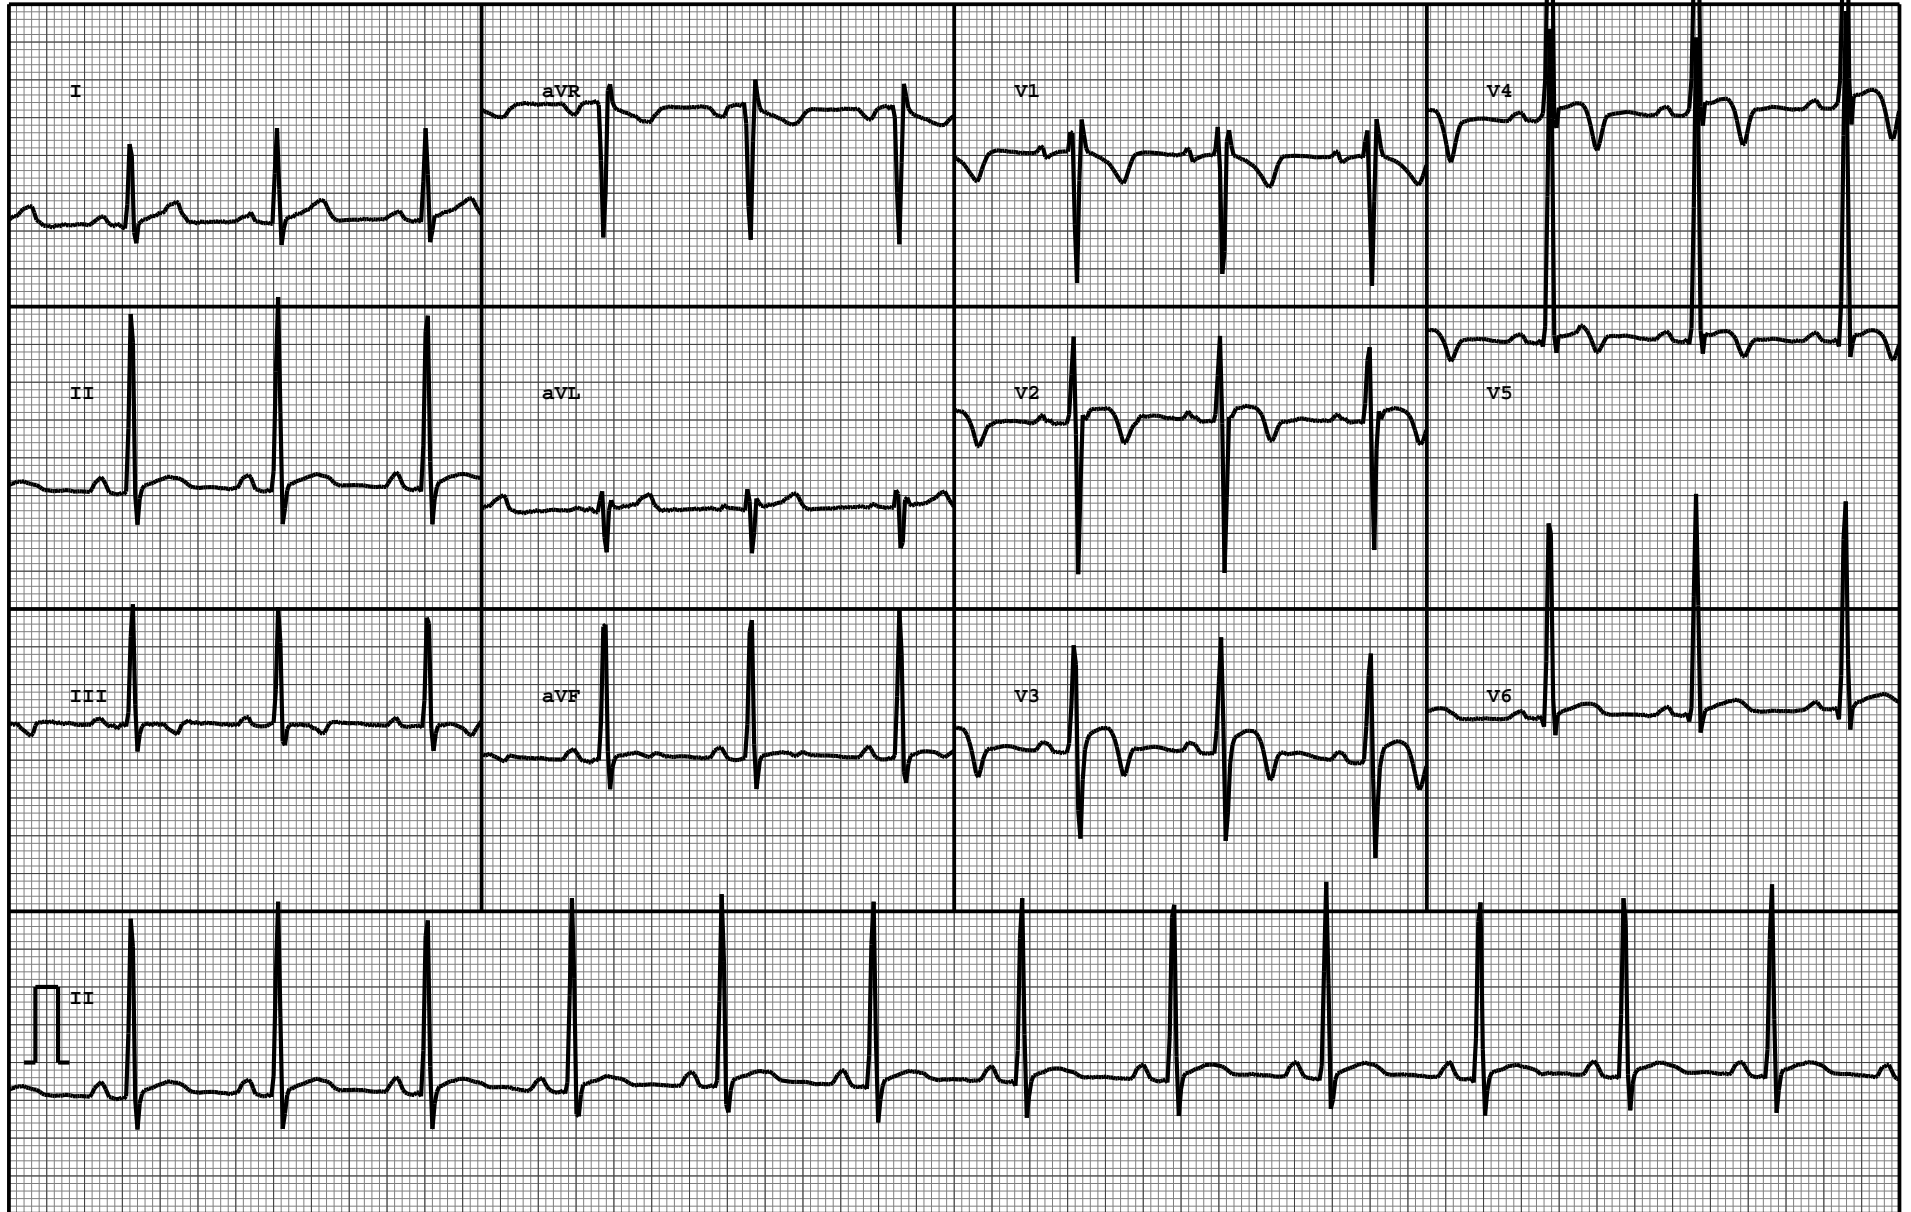

**Title:**

Standardised pre-competitive screening of athletes in some European and African countries: The SMILE study.

**Journal:**

Internal and Emergency Medicine.

**Author and Affiliations:**

Assanelli Deodato Chair of Sports-Internal Medicine, University of Brescia (Italy)

Ermolao Andrea Sports Medicine Division, Department of Medicine, University of Padova, Italy

Carré François Unité Biologie et Médecine du Sport, Hôpital Pontchavillon, Rennes, France

Deligiannis Asterios Chair of Sport Medicine University of Thessaloniki, Greece

Mellwig Klaus Heart Center NRW, University Hospital, Bad Oeynhausen, Germany

Tahmi Mohamed Service de cardiologie, CHU de Tizi-Ouzou, Algery

Cesana Bruno Mario Chair of statistics, University of Brescia (Italy)

Levaggi Rosella Chair of Health Economics University of Brescia, Italy

Aliverti Paola ET Medical Devices, Milan (Italy)

Sharma Sanjay Department of Heart Muscle Disorders and Sports Cardiology, St Georges Hospital, London, UK

**Corresponding author:** Assanelli Deodato

**E-mail:** [dassanelli@gmail.com](mailto:dassanelli@gmail.com)
