# Supplementary material for: Standardised pre-competitive screening of athletes in some European and African countries: the SMILE study
Source: Springer Nature journal article supplement (doi:10.1007/s11739-013-0955-5), 2013-05-25
Supplement: 11739_2013_955_MOESM5_ESM.pdf [file 11739_2013_955_MOESM5_ESM.pdf]

**Table ESM\_5:** Further evaluations performed in athletes with a positive SMILE test, according to the 2<sup>nd</sup>- 3<sup>rd</sup> opinion advice

| <b>Exams needed</b>                         | <b>Europe</b> | <b>Algeria</b> | <b>Total</b> |
|---------------------------------------------|---------------|----------------|--------------|
| <b>Cardiac echo</b>                         | 59            | 139            | 198          |
| <b>Exercise ECG</b>                         | 59            | 75             | 134          |
| <b>Cardiac MRI</b>                          | 8             | 0              | 8            |
| <b>Myocardial perfusion imaging</b>         | 1             | 10             | 11           |
| <b>ECG Holter</b>                           | 7             | 15             | 22           |
| <b>Cardiac Computed Tomography</b>          | 2             | 1              | 3            |
| <b>Digestive endoscopy</b>                  | 0             | 1              | 1            |
| <b>Thyroid hormones</b>                     | 1             | 1              | 2            |
| <b>Coronary angiography</b>                 | 2             | 1              | 3            |
| <b>Intracardiac electrophysiology study</b> | 0             | 15             | 15           |
| <b>Tilt table test</b>                      | 1             | 0              | 1            |
| <b>Renal arteries doppler</b>               | 0             | 1              | 1            |
| <b>Right Ventricular angiography</b>        | 1             | 0              | 1            |

**Title:**

Standardised pre-competitive screening of athletes in some European and African countries: The SMILE study.

**Journal:**

Internal and Emergency Medicine.

**Author and Affiliations:**

Assanelli Deodato Chair of Sports-Internal Medicine, University of Brescia (Italy)

Ermolao Andrea Sports Medicine Division, Department of Medicine, University of Padova, Italy

Carré François Unité Biologie et Médecine du Sport, Hôpital Pontchavillon, Rennes, France

Deligiannis Asterios Chair of Sport Medicine University of Thessaloniki, Greece

Mellwig Klaus Heart Center NRW, University Hospital, Bad Oeynhausen, Germany

Tahmi Mohamed Service de cardiologie, CHU de Tizi-Ouzou, Algery

Cesana Bruno Mario Chair of statistics, University of Brescia (Italy)

Levaggi Rosella Chair of Health Economics University of Brescia, Italy

Aliverti Paola ET Medical Devices, Milan (Italy)

Sharma Sanjay Department of Heart Muscle Disorders and Sports Cardiology, St Georges Hospital, London, UK

**Corresponding author:** Assanelli Deodato

**E-mail:** [dassanelli@gmail.com](mailto:dassanelli@gmail.com)
